# Supplementary material
Source: Springer Nature journal article supplement (https://www.springermedizin.de/resource/supplementary/12936_2012_2207_MOESM1_ESM.pdf/9542842)
Supplement: MOESM1 [file 9542842]

Total number of patients included in RCTs n=6,179

AE analysis  
N=6,179 patients

TEAE analysis  
N=3,334 patients

8,542 AE

6,294 AE

3,943 TEAE

ASAQ  
N=3,113 patients  
3,634 AE

Comparator  
N=3,066 patients  
4,908 AE

ASAQ  
N=1,281 patients  
2,426 AE

Comparator  
N=2,053 patients  
3,868 AE

ASAQ  
N=1,281 patients  
1,493 TEAE

Comparator  
N=2,053 patients  
2,450 TEAE

AE = any event (sign/symptom) occurring after first drug intake (irrespective of whether present at enrolment or not) Irrespective of causality

TEAE = event (sign/symptom) occurring after first drug intake that was not present or was less intense at enrolment Irrespective of causality
